# Supplementary material for: Clinical data and characterization of the liver conditional mouse model exclude neoplasia as a non-neurological manifestation associated with Friedreich’s ataxia
Source: PubMed Central journal article supplement — Dis Model Mech. 2012 Jun 26;5(6):860–9. doi: 10.1242/dmm.009829 (PMC3484868; doi:10.1242/dmm.009829), 2012-06-26
Supplement: supp_009829_DMM009829TableS1.pdf [file supp_009829_DMM009829TableS1.pdf]

**Table S1. Age distribution, prevalence and incidence of cancer in the general population, the FA-COMS cohort and the EFACTS cohort.**

|                                    | <b>US population</b> | <b>FA-COMS</b> | <b>EFACTS</b>            | <b>Western Europe</b> |
|------------------------------------|----------------------|----------------|--------------------------|-----------------------|
| <b>mean age</b>                    | 37.2 <sup>a</sup>    | 28.1           | 34.6                     | n.a.                  |
| <b>&lt;20 yrs</b>                  | 27% <sup>a</sup>     | 39.60%         | 15.80%                   | n.a.                  |
| <b>20-49 yrs</b>                   | 41% <sup>a</sup>     | 51.20%         | 71.75%                   | n.a.                  |
| <b>&gt;50 yrs</b>                  | 32% <sup>a</sup>     | 11.10%         | 12.45%                   | n.a.                  |
| <b>cancer prevalence</b>           | 3.39% <sup>b</sup>   | 1.04%          | 1.38%/1.64% <sup>e</sup> | 1,89% <sup>f</sup>    |
| <b>cancer incidence (per year)</b> | 0.48% <sup>c</sup>   | 0.40%          | n.a.                     | n.a.                  |
| <b>median age at diagnosis</b>     | 66 <sup>d</sup>      | 43.6           | 45.4                     | n.a.                  |

<sup>a</sup> Values from 2010 census (<http://http://www.census.gov/population/www/cen2010/glance/>)

<sup>b</sup> Limited duration prevalence (0-19 yrs) for all ethnicity, all sites, all ages, both sexes, by years since diagnosis (SEER November 2011 submission. <http://seer.cancer.gov/faststats>)

<sup>c</sup> Incidence of cancer for all ethnicity, all sites, all ages, both sexes, by year (SEER November 2011 submission. <http://seer.cancer.gov/faststats>)

<sup>d</sup> Value from 2005-2009 (<http://seer.cancer.gov/faststats>)

<sup>e</sup> prevalence of cancer for adults (>20 years) of the EFACTS cohort (5/304)

<sup>f</sup> Five-year prevalence of cancer for the adult population of western Europe, all sites, both sexes (<http://globocan.iarc.fr>)

n.a.: data not available
